# Supplementary material
Source: PubMed Central journal article supplement (PMC7751278)

## **Time-restricted feeding prevents obesity and metabolic syndrome in mice lacking a circadian clock.**

Amandine Chaix, Terry Lin, Hiep D Le, Max W Chang, Satchidananda Panda.

### **Supplemental figures and tables - Titles and legends**

#### **Figure S1 – related to figure 1 and figure 2: Time-restricted feeding does not affect activity and food patterns.**

A-B-C. Day/night repartition in % of total activity from metabolic cages recordings in (A) *Bmal1<sup>LKO</sup>* (n=4/group), (B) *Rev-erba/β<sup>LDKO</sup>* (n=4/group), (C) CDKO (n=4/group) during the 3 days on TRF (see figure 2C-2G-2K).

D-E-F. Daily repartition of calorie consumption from metabolic cages recordings in (D) *Bmal1<sup>LKO</sup>* (n=4/group), (E) *Rev-erba/β<sup>LDKO</sup>* (n=4/group), (F) CDKO (n=4/group) during the 3 days on TRF (see figure 2D-2H-2L).

#### **Figure S2 – related to figure 3 and figure 4: Mice on TRF have more lean mass and *Bmal1<sup>LKO</sup>* mice are insulin sensitive.**

A-B-C. Relative lean mass as a percent of body weight in (A) *Bmal1<sup>LKO</sup>* and littermate controls (n=4-5/group), (B) *Rev-erba/β<sup>LDKO</sup>* and littermate controls (n=8-11/group), (C) CDKO and littermate controls (n=8-9/group). Unpaired t-test, \* p<0.05, \*\* p<0.01, \*\*\* p<0.001.

D. Insulin tolerance test (ITT) in *Bmal1<sup>LKO</sup>* and littermate controls (n=6-10/group).

#### **Figure S3 – related to figure 5: selected metabolites levels.**

A. Folate levels in *Bmal1<sup>LKO</sup>*, *Rev-erba/β<sup>LDKO</sup>* and CDKO on FA and FT.

B. Three-dimensional PCA plot of metabolomics data from all samples (generated by MetaboAnalyst).

C. Metabolites level and gene expression profiles relevant to the NAD<sup>+</sup> salvage pathway.

#### **Figure S4 – related to figure 5: Heatmap of rhythmic metabolites levels.**

Heatmap representation showing diurnal levels of rhythmic metabolites identified by MetaCycle

and aligned by phase in WT, *Bmal1*<sup>LKO</sup>, *Rev-erba/β*<sup>LDKO</sup> and CDKO.

**Figure S5 – related to figure 6 and figure 7: selected gene expression profiles.**

- A. Expression profile of *Pten*, *Apoe*, *Fabp1*, *Scd25a1* in WT, *Bmal1*<sup>LKO</sup>, *Rev-erba/β*<sup>LDKO</sup> and CDKO on FA.
- B. Expression profile of *Nnt* and *Dnaja4* in WT, *Bmal1*<sup>LKO</sup>, *Rev-erba/β*<sup>LDKO</sup> and CDKO on FA.
- C- Heatmap representation of 141 lipid metabolism and 73 cholesterol metabolism genes that are different between *Bmal1*<sup>LKO</sup> and versus WT respectively.
- D. Expression profile of *Sik1* in WT and *Bmal1*<sup>LKO</sup>, *Hsd17b2* in WT and *Rev-erba/β*<sup>LDKO</sup> and *Poli* in WT and CDKO.
- E. Expression level of genes represented in figure 6E in *Rev-erba/β*<sup>LDKO</sup> versus *Rev-erba/β*<sup>LWT</sup> littermates controls from Cho et al, 2012.

**Figure S6 – related to figure 6: pathway enrichment analysis.**

Results of pathway enrichment analysis from differentially expressed genes between (A) *Bmal1*<sup>LKO</sup>-FA vs WT-FA, (B) *Rev-erba/β*<sup>LDKO</sup>-FA vs WT-FA, (C) CDKO-FA vs WT-FA as indicated.

**Figure S7 – related to figure 6 and figure 7: expression profile of clock and clock output genes.**

Expression profile (normalized counts from RNA-seq) of (A) *Bmal1*, (B) *Dbp*, (C) *Per2*, (D) *Cry1*, (E) *Rev-erba/β*, (F) *Nampt*, (G) *Lpl*, (H) *Por*, and (I) *Insig2* in *Bmal1*<sup>LKO</sup>, *Rev-erba/β*<sup>LDKO</sup>, CDKO and control.

**FIGURE S1 - related to figure 1 and figure 2**

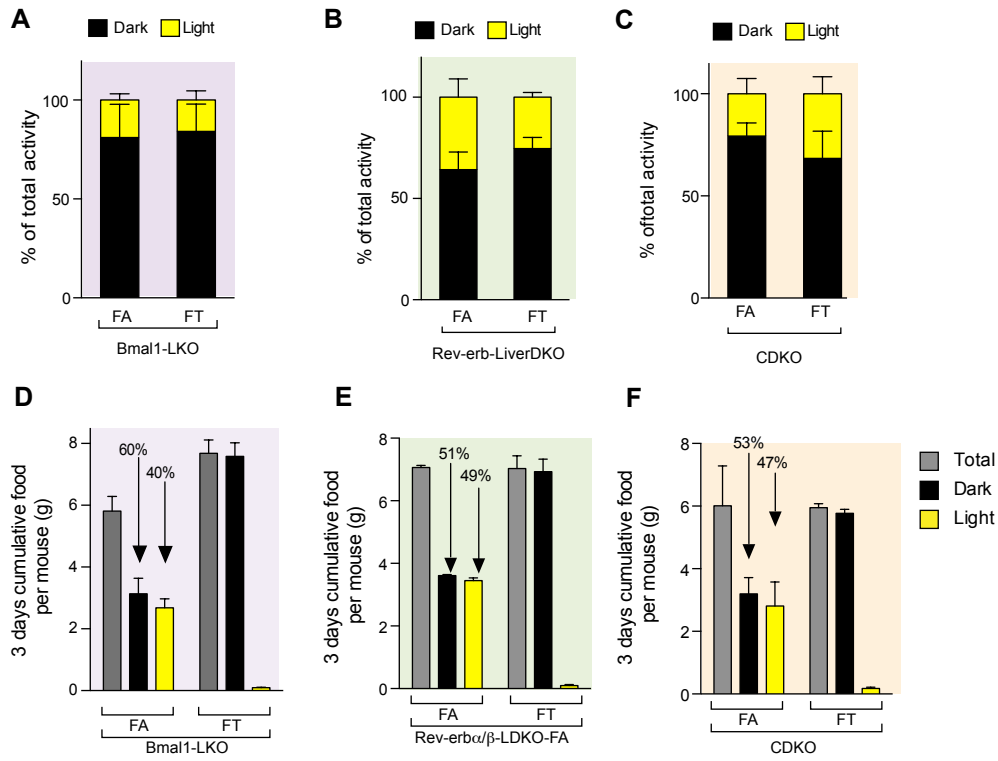

**FIGURE S2 - related to figure 3 and figure 4**

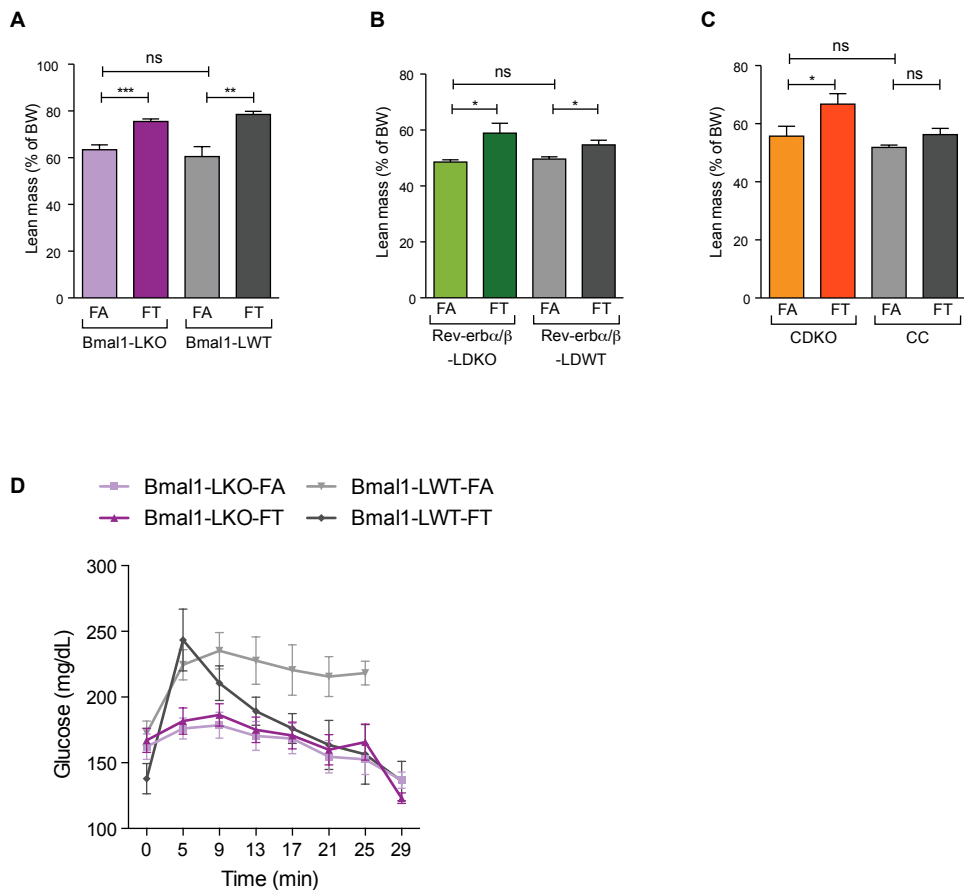

**FIGURE S3 - related to figure 5**

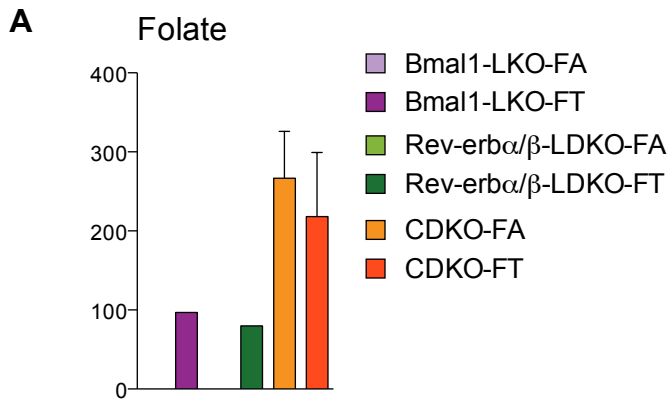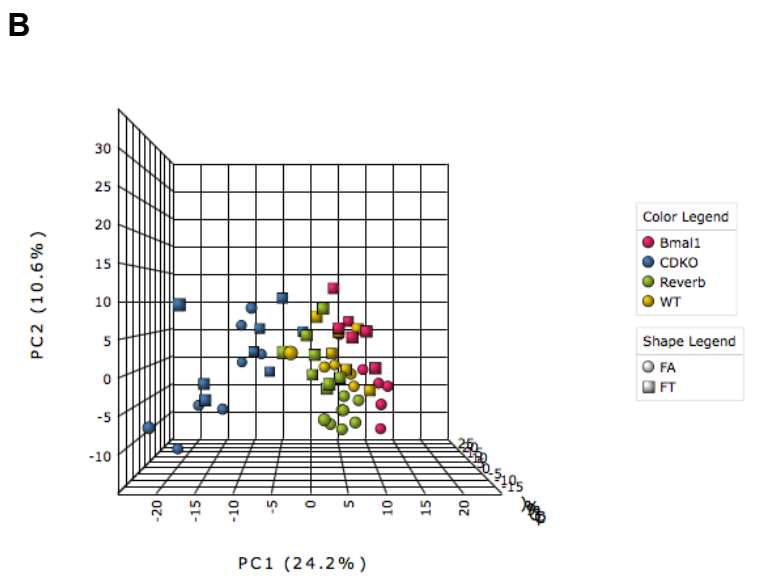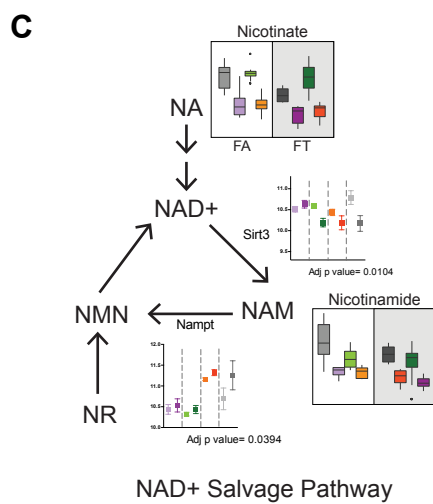

**FIGURE S4 - related to figure 5**

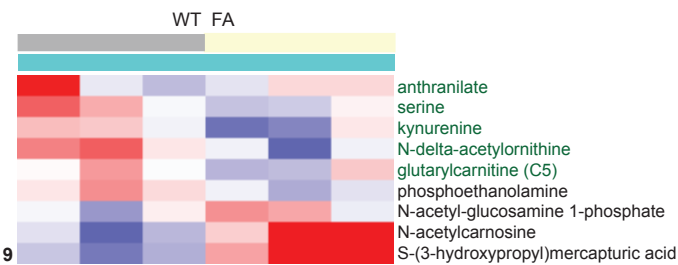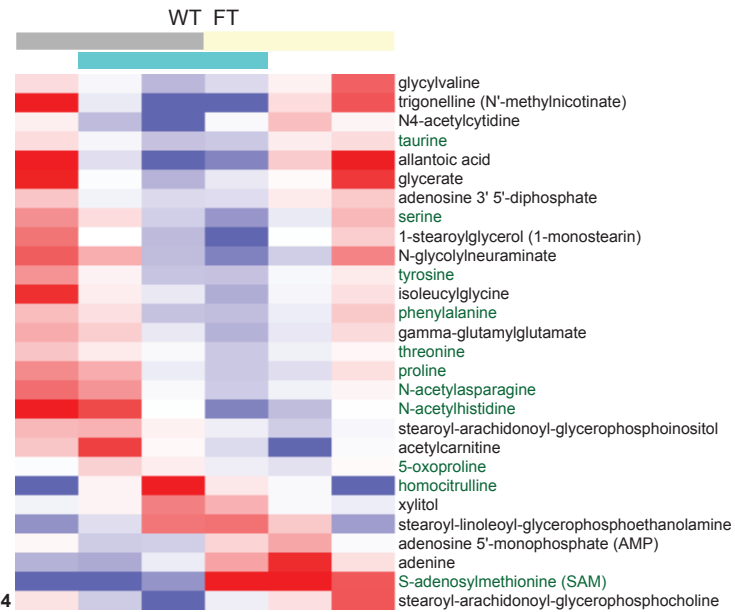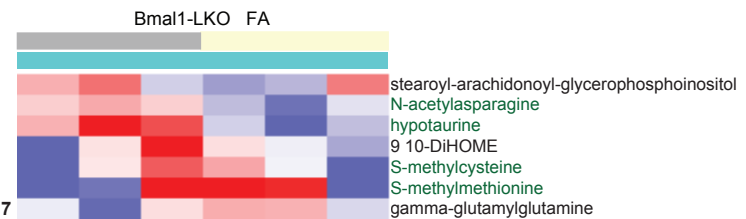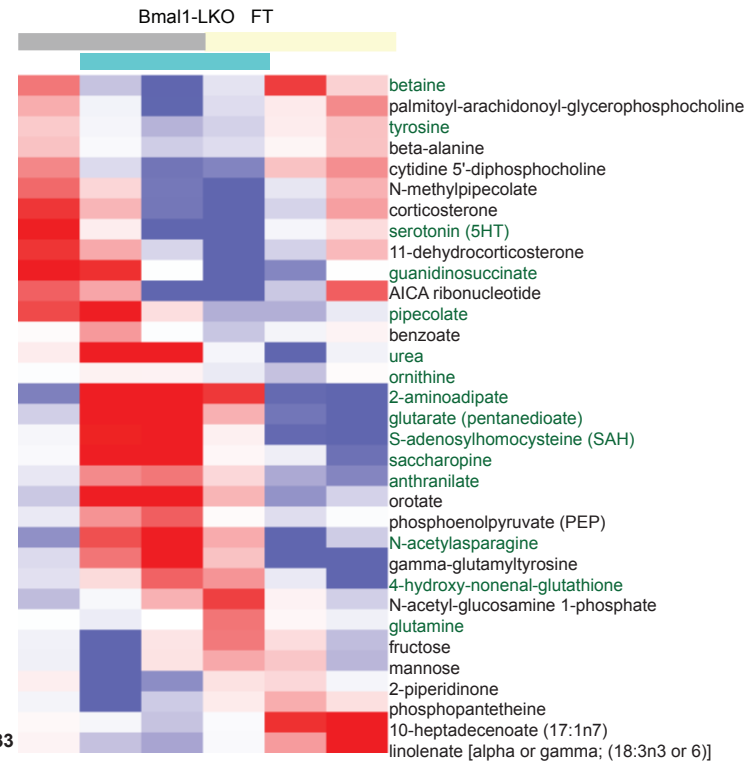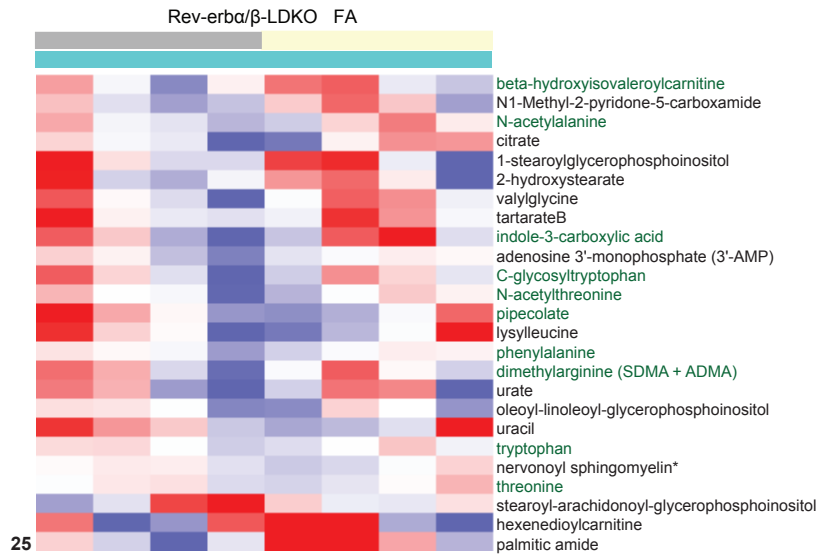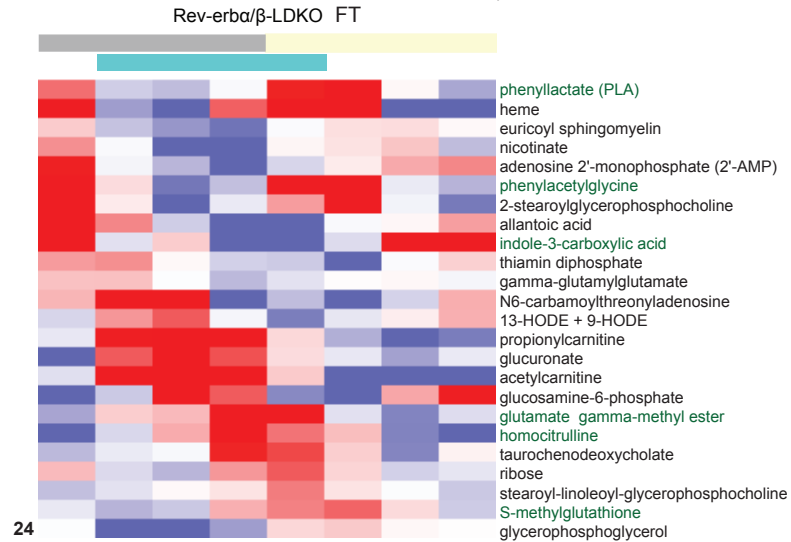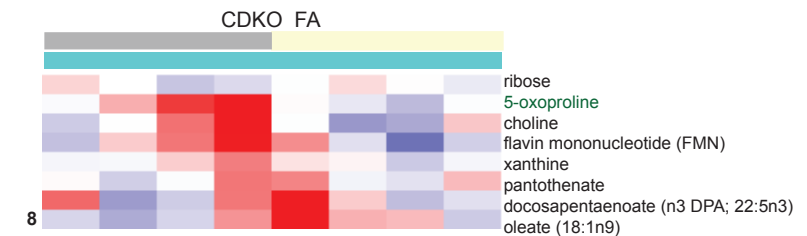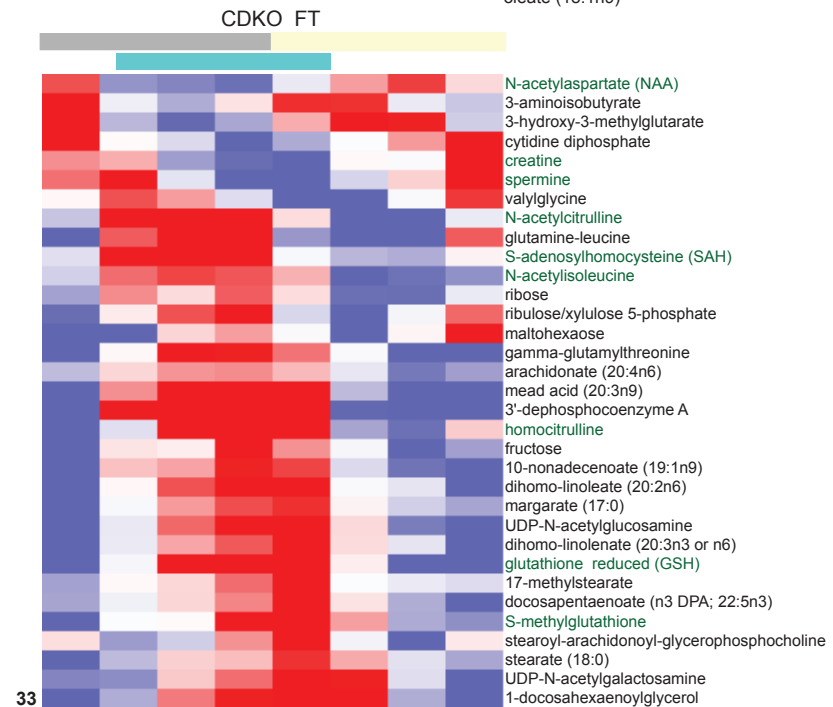

**FIGURE S5 - related to figure 6 and figure 7**

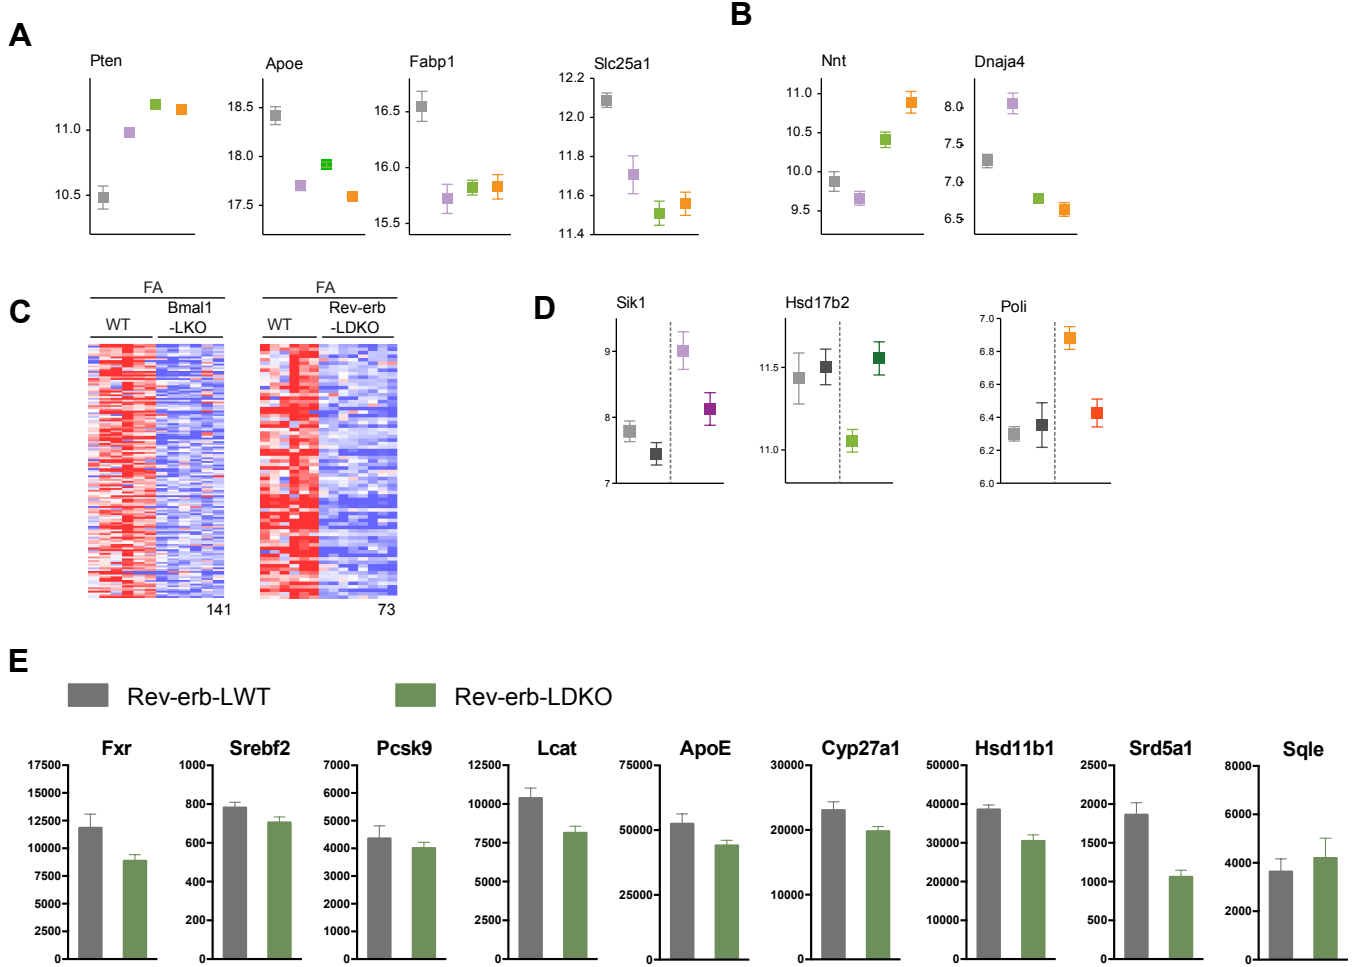

**FIGURE S6 - related to figure 6**

**A Bmal1-LKO FA vs WT-FA**

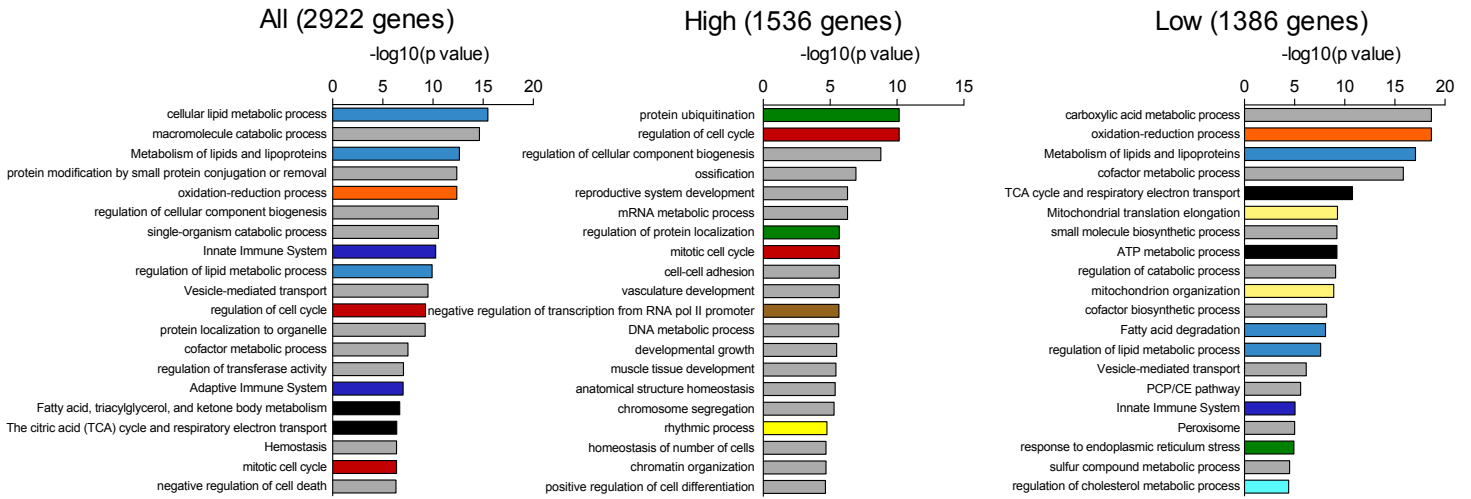

**B Reverb  $\alpha/\beta$ -LDKO FA vs WT-FA**

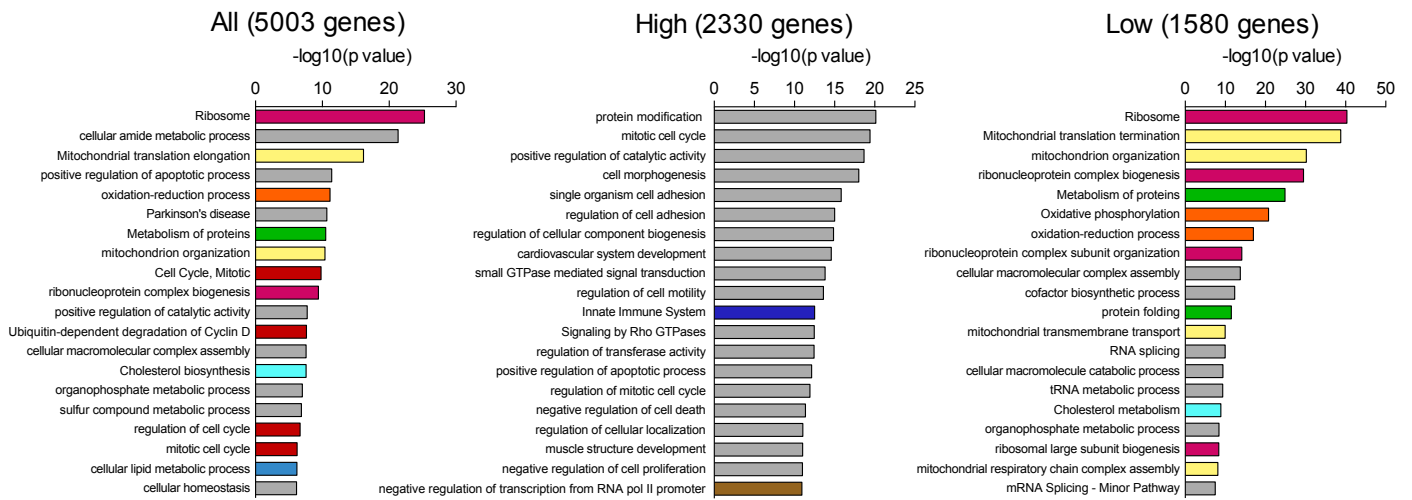

**C CDKO FA vs WT-FA**

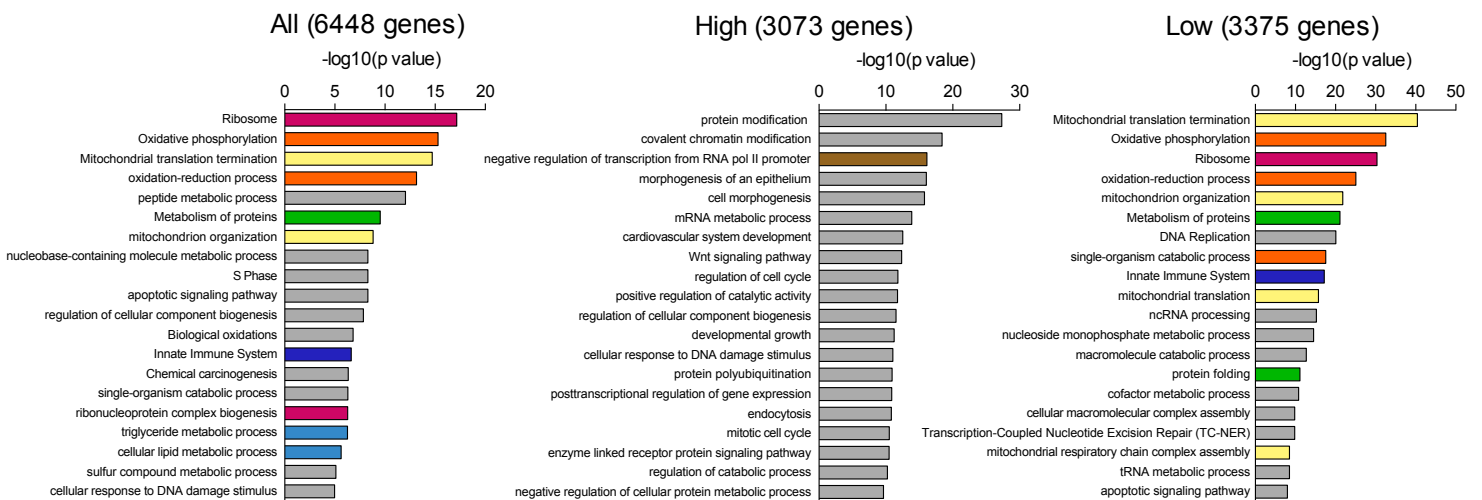



**FIGURE S7 - related to figure 6 and figure 7**

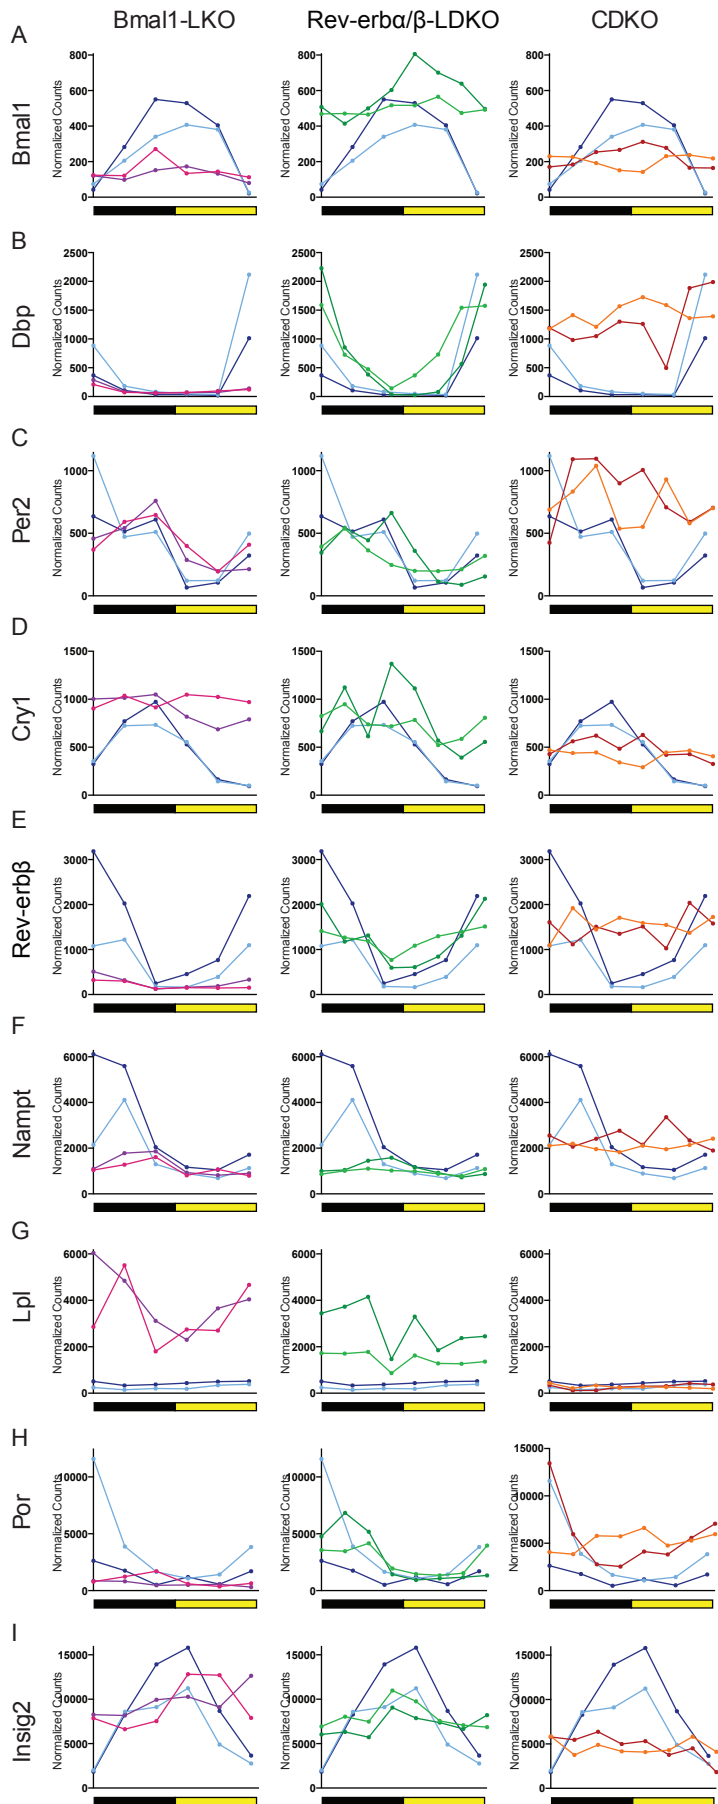

Supplement: NIHMS1504201-supplement-2.pdf [file NIHMS1504201-supplement-2.pdf]
